# Supplementary material
Source: publisher figshare collection journal article supplement (https://aacr.figshare.com/articles/dataset/_/23391317)
Supplement: Supplementary file 1 [file 41119907]

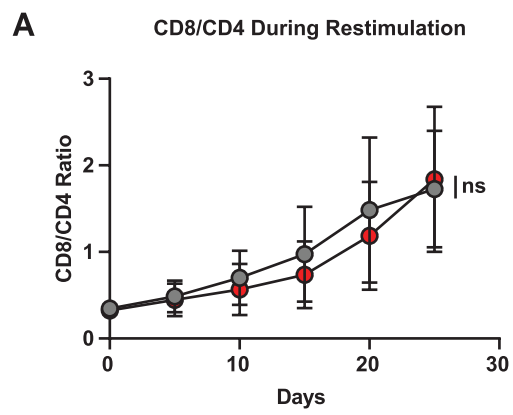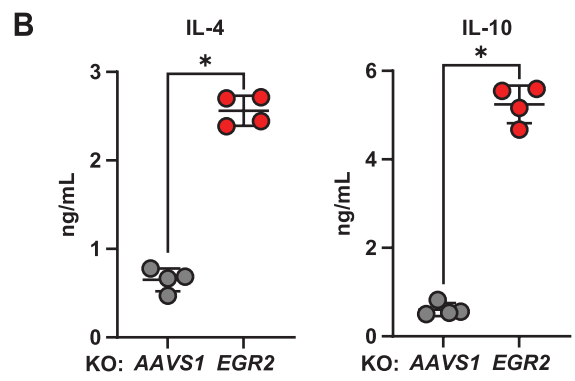

**Supplementary Figure 2. Impact of *EGR2* knockout on CD8<sup>+</sup>/CD4<sup>+</sup> ratio and Th2 cytokine production in the setting of chronic tumor antigen stimulation.** **A**, Comparison of CD8<sup>+</sup>/CD4<sup>+</sup> ratio in control and *EGR2* knockout (KO) CAR T-cells after chronic CAR stimulation. **B**, Th2 cytokine production by control and *EGR2* KO CAR T-cells after 24 hours of CAR stimulation (Mann-Whitney test,  $n = 4$ ). All experiments were performed using T-cells from three independent healthy donors. Panel **B** is representative data from one donor. \* $P < 0.05$ , \*\* $P < 0.01$ , \*\*\* $P < 0.001$ , ns: not significant.
